# Supplementary material for: The Pentameric Ligand-Gated Ion Channel Family: A New Member of the Voltage Gated Ion Channel Superfamily?
Source: MDPI journal article supplement (doi:10.3390/ijms25095005), 2024-05-03
Supplement: s1 [file s1]

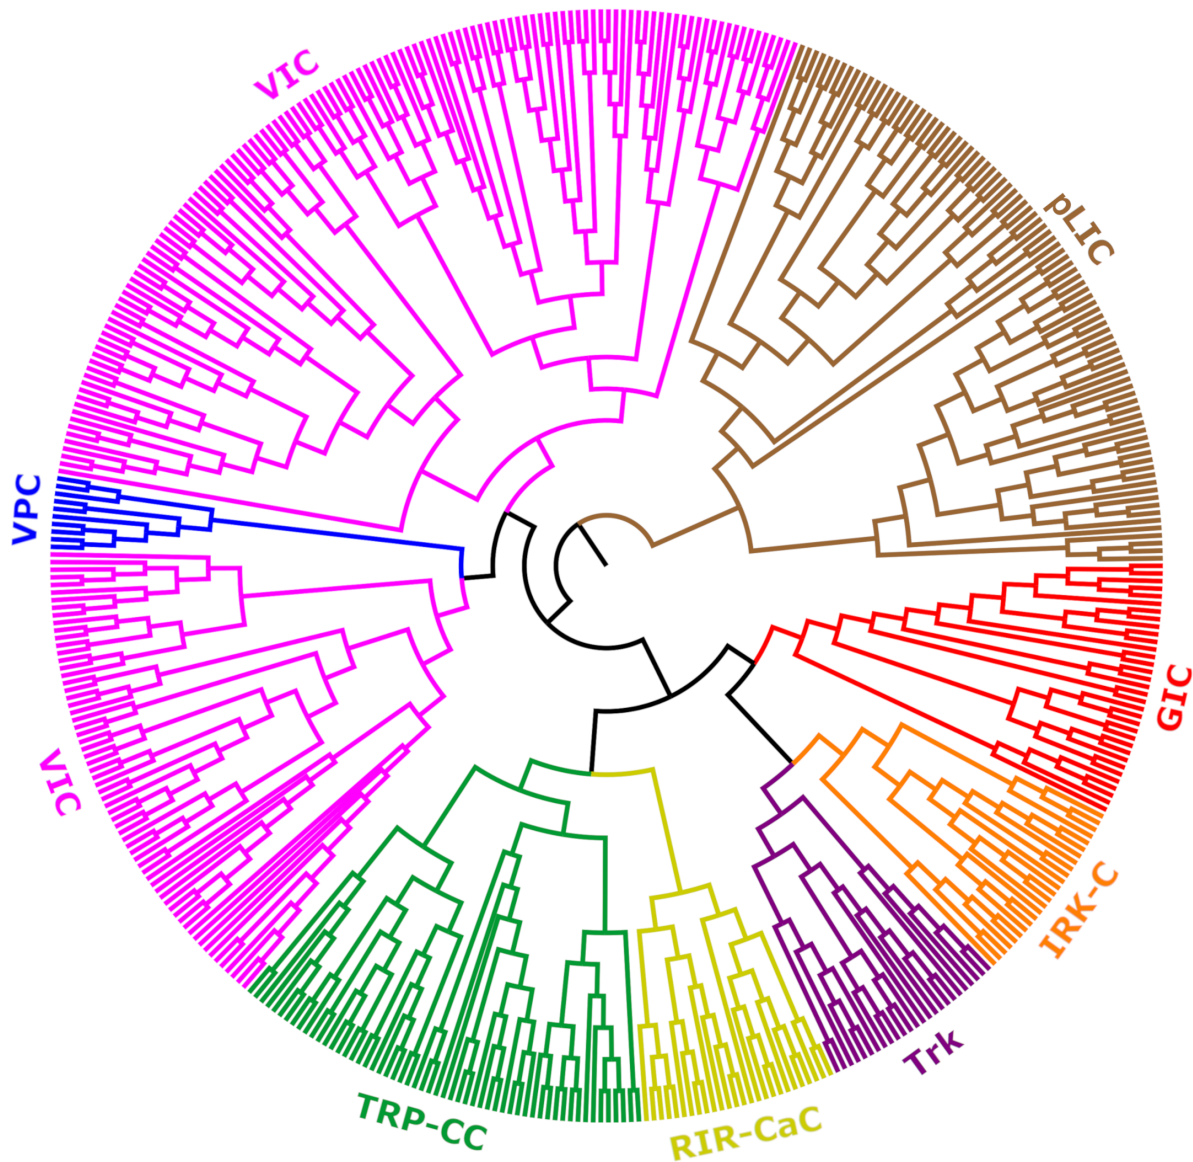

**Figure S4. The VIC superfamily tree.** Relationship among all 7 families within the VIC superfamily and the pLIC family. Only established members from each family in TCDB were used. Each family is labeled and shown in different colors. The R package (<https://www.r-project.org/>) was used to run hierarchical clustering of Smith-Waterman pairwise alignment bitscores (Ward method; agglomerative coefficient: 0.995; See Methods). Note that families GIC and VPC are the most distant families in their respective branches.
