# Supplementary material for: The Pentameric Ligand-Gated Ion Channel Family: A New Member of the Voltage Gated Ion Channel Superfamily?
Source: MDPI journal article supplement (doi:10.3390/ijms25095005), 2024-05-03
Supplement: s1 [file s1]

**Table S4. Signature Regions (SR) recovery rates.** Data are presented for families pLIC (TC: 1.A.9), GIC (TC:1.A.10) and VPC (TC: 1.A.51). MAST was run using a threshold E-value of  $1 \times 10^{-3}$  (see Methods).

| Family | Number of homologs | Homologs with SR | Recovery rate (%) |
|--------|--------------------|------------------|-------------------|
| pLIC   | 14,502             | 5,533            | 38.15             |
| GIC    | 9,547              | 7,712            | 80.77             |
| VPC    | 718                | 568              | 79.1              |
