# Supplementary material for: The Pentameric Ligand-Gated Ion Channel Family: A New Member of the Voltage Gated Ion Channel Superfamily?
Source: MDPI journal article supplement (doi:10.3390/ijms25095005), 2024-05-03
Supplement: s1 [file s1]

**Table S3. TMS and Reentrant Loop Statistics across the VIC superfamily.** See Methods for details on structure retrieval from TmAlphaFold, clustering, mapping to TC identifiers, manual inspection and calculations. The table presents 8 columns: (1) Type of secondary structure elements composing the reentrant loops (RL), where H: Helix and L: Loop; (2) clusters were named with the TC identifier mapping to at least 60% of the structures in the cluster, with the additional constraint that at least 60% of all the structures in our data set that mapped to this TC identifier belong to this cluster; (3) size of the cluster in number of structures. Clusters with only one protein were ignored; (4) number of structures that were sampled for manual inspection; (5) mean and Standard Deviation (SD) of the number of TMSs; (6) mean and SD of TMS lengths; (7) mean and SD of RL counts; and (8) mean and SD of RL lengths. Note the similarity in multiple clusters between the average lengths of TMS and RLs.

| Type              | Cluster    | Size | Sample | TMS number<br>( $\pm$ SD) | TMS lengths<br>( $\pm$ SD) | RL number<br>( $\pm$ SD) | RL lengths<br>( $\pm$ SD) |
|-------------------|------------|------|--------|---------------------------|----------------------------|--------------------------|---------------------------|
| H-L               | 1_A_10     | 40   | 30     | 3.03 ( $\pm$ 0.18)        | 19.84 ( $\pm$ 3.23)        | 1.0 ( $\pm$ 0.0)         | 20.93 ( $\pm$ 3.24)       |
| H-L               | 1_A_1_1    | 2    | 2      | 3.00 (0.0)                | 21.00 ( $\pm$ 2.94)        | 1.0 ( $\pm$ 0.0)         | 21.0 ( $\pm$ 0.0)         |
| H-L               | 1_A_1_13_1 | 3    | 3      | 4.67 ( $\pm$ 1.89)        | 16.21 ( $\pm$ 1.15)        | 1.0 ( $\pm$ 0.0)         | 17.67 ( $\pm$ 2.49)       |
| H-L               | 1_A_1_2    | 40   | 30     | 5.90 ( $\pm$ 0.30)        | 20.33 ( $\pm$ 4.08)        | 1.0 ( $\pm$ 0.0)         | 15.55 ( $\pm$ 3.86)       |
| H-L               | 1_A_1_29   | 2    | 2      | 3.00 ( $\pm$ 0.0)         | 22.67 ( $\pm$ 0.94)        | 1.0 ( $\pm$ 0.0)         | 15.0 ( $\pm$ 0.0)         |
| H-L               | 1_A_1_4    | 5    | 5      | 5.40 ( $\pm$ 0.80)        | 24.11 ( $\pm$ 5.66)        | 1.2 ( $\pm$ 0.4)         | 23.83 ( $\pm$ 2.61)       |
| H-L               | 1_A_1_5    | 20   | 20     | 6.00 ( $\pm$ 0.0)         | 20.68 ( $\pm$ 3.55)        | 1.0 ( $\pm$ 0.0)         | 18.63 ( $\pm$ 3.87)       |
| H-L               | 1_A_1_7    | 9    | 9      | 6.00 ( $\pm$ 2.31)        | 22.57 ( $\pm$ 3.10)        | 1.78 ( $\pm$ 0.42)       | 21.13 ( $\pm$ 4.48)       |
| H-L               | 1_A_2      | 64   | 30     | 2.00 ( $\pm$ 0.0)         | 19.58 ( $\pm$ 3.18)        | 1.0 ( $\pm$ 0.0)         | 22.1 ( $\pm$ 4.4)         |
| H-H*              | 1_A_4      | 14   | 14     | 5.79 ( $\pm$ 0.41)        | 21.09 ( $\pm$ 5.19)        | 1.0 ( $\pm$ 0.0)         | 15.5 ( $\pm$ 3.02)        |
| H-LH <sup>ψ</sup> | 1_A_4_6    | 2    | 2      | 5.50 ( $\pm$ 0.50)        | 22.64 ( $\pm$ 6.80)        | 1.0 ( $\pm$ 0.0)         | 16.5 ( $\pm$ 2.5)         |
| H-L               | 1_A_9_6_3  | 2    | 2      | 2.50 ( $\pm$ 1.50)        | 24.20 ( $\pm$ 2.48)        | 2.0 ( $\pm$ 0.0)         | 15.5 ( $\pm$ 0.5)         |
| H-L               | 2_A_38     | 14   | 14     | 9.07 ( $\pm$ 1.03)        | 19.00 ( $\pm$ 3.87)        | 5.0 ( $\pm$ 0.0)         | 18.24 ( $\pm$ 3.7)        |
| H-L               | 2_A_38_3   | 7    | 7      | 8.14 ( $\pm$ 0.35)        | 20.84 ( $\pm$ 3.64)        | 4.0 ( $\pm$ 0.0)         | 18.89 ( $\pm$ 3.96)       |

\* Both helices are within the membrane plane.

<sup>ψ</sup> It is not clear whether the second helix is in the membrane. Thus, it may be an H-L configuration.
