# Supplementary material for: The Pentameric Ligand-Gated Ion Channel Family: A New Member of the Voltage Gated Ion Channel Superfamily?
Source: MDPI journal article supplement (doi:10.3390/ijms25095005), 2024-05-03
Supplement: s1 [file s1]

**Table S2. Top pLIC vs GIC 3D structural alignments.** Data are organized in 5 columns: (1) PDB IDs, including the chain, of the LIC and GIC structures being compared; (2) Root Mean Square Deviation (RMSD) score; (3) TM-score; (4) length of the structures being compared. The large hydrophilic loop between TMSs 3 and 4 was removed to focus the alignments of the TMSs. (5) alignment coverage. Rows are sorted by TM-score. See Methods for details.

| Alignment (pLIC vs GIC) | RMSD (Å) | TM-score | Length | Coverage |
|-------------------------|----------|----------|--------|----------|
| 1OED_C vs 6NJJ_A        | 4.06     | 0.42547  | 78     | 61.42%   |
| 1OED_E vs 6NJJ_B        | 3.46     | 0.42339  | 71     | 55.47%   |
| 1OED_C vs 5VOU_A        | 3.89     | 0.42155  | 77     | 60.63%   |
| 1OED_C vs 6NJJ_C        | 3.97     | 0.42153  | 77     | 60.63%   |
| 1OED_C vs 5VOT_B        | 3.98     | 0.42106  | 74     | 58.27%   |
| 1OED_E vs 6NJJ_B        | 3.48     | 0.42068  | 71     | 55.47%   |
| 1OED_C vs 6NJJ_A        | 4.05     | 0.42032  | 77     | 60.63%   |
