# Supplementary material for: The Pentameric Ligand-Gated Ion Channel Family: A New Member of the Voltage Gated Ion Channel Superfamily?
Source: MDPI journal article supplement (doi:10.3390/ijms25095005), 2024-05-03
Supplement: s1 [file s1]

**Table S1: Top pLIC vs VPC 3D structural alignments.** Data are organized in 5 columns: (1) PDB IDs, including the chain, of the pLIC and VPC structures being compared; (2) Root Mean Square Deviation (RMSD) score; (3) TM-score; (4) length of the structures being compared. The large hydrophilic loop between TMSs 3 and 4 was removed to focus the alignments of the TMSs. (5) alignment coverage was calculated based on residues within the membrane plane. Rows are sorted by TM-score. See Methods for details.

| Alignment (pLIC vs VPC) | RMSD (Å) | TM-score | Length | Coverage |
|-------------------------|----------|----------|--------|----------|
| 2MAW_A vs 4G7V_S        | 3.66     | 0.55317  | 100    | 91.4%    |
| 2MAW_A vs 4G7Y_S        | 3.63     | 0.51823  | 100    | 84.8%    |
| 2LM2_A vs 4G7V_S        | 3.91     | 0.51119  | 103    | 83.2%    |
| 6PV7_A vs 4G7V_S        | 3.92     | 0.51022  | 105    | 79.1%    |
| 2LM2_A vs 4G7Y_S        | 3.88     | 0.50932  | 100    | 83.8%    |
| 6CNJ_A vs 4G7Y_S        | 3.98     | 0.50499  | 103    | 82.2%    |
